# Supplementary material for: Water soluble ionic Co(ii), Cu(ii) and Zn(ii) diimine–glycinate complexes targeted to tRNA: structural description, in vitro comparative binding, cleavage and cytotoxic studies towards chemoresistant prostate cancer cells
Source: Royal Society of Chemistry journal article supplement (doi:10.1039/d0dt02657c), 2020-01-01
Supplement: d0dt02657c1.pdf [file d0dt02657c1.pdf]

## Supplementary Information

### Water soluble ionic Co(II), Cu(II) & Zn(II) diimine-glycinate complexes targeted to tRNA: Structural description, *in vitro* comparative binding, cleavage and cytotoxic studies towards chemoresistant prostate cancer cells

Sifteen Zehra<sup>a</sup>, Santiago Gómez–Ruiz<sup>b</sup>, Hifzur R. Siddique<sup>c</sup>, Sartaj Tabassum<sup>a</sup> and Farukh Arjmand<sup>a</sup>

<sup>a</sup>Department of Chemistry, Aligarh Muslim University, Aligarh, U.P, India-202002

<sup>b</sup>Departamento de Biología y Geología, Física y Química Inorgánica, Universidad Rey Juan Carlos, C/Tulipán s/n, 28933 Móstoles, Madrid, Spain

<sup>c</sup>Section of Genetics, Department of Zoology, Aligarh Muslim University, Aligarh, U.P, India-202002

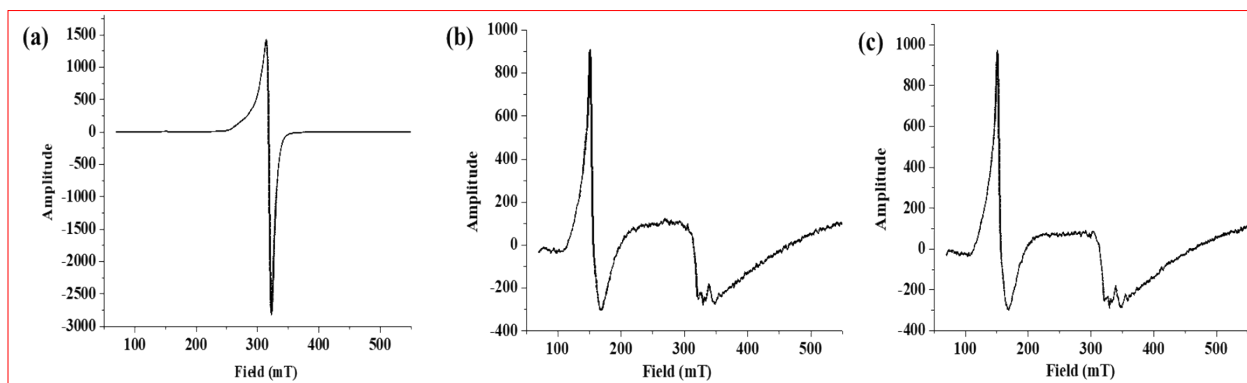

**Fig. S1.** EPR spectra of complexes **1**, **2** and **4** at Liquid Nitrogen Temperature.

WATERS,Q-TOF MICROMASS (ESI-MS)  
SIFFEEN SZ-51- 3 (0.056) Cm (2:7-9:29)

SAIF/CIL,PANJAB UNIVERSITY,CHANDIGARH  
TOF MS ES+  
1.67e3

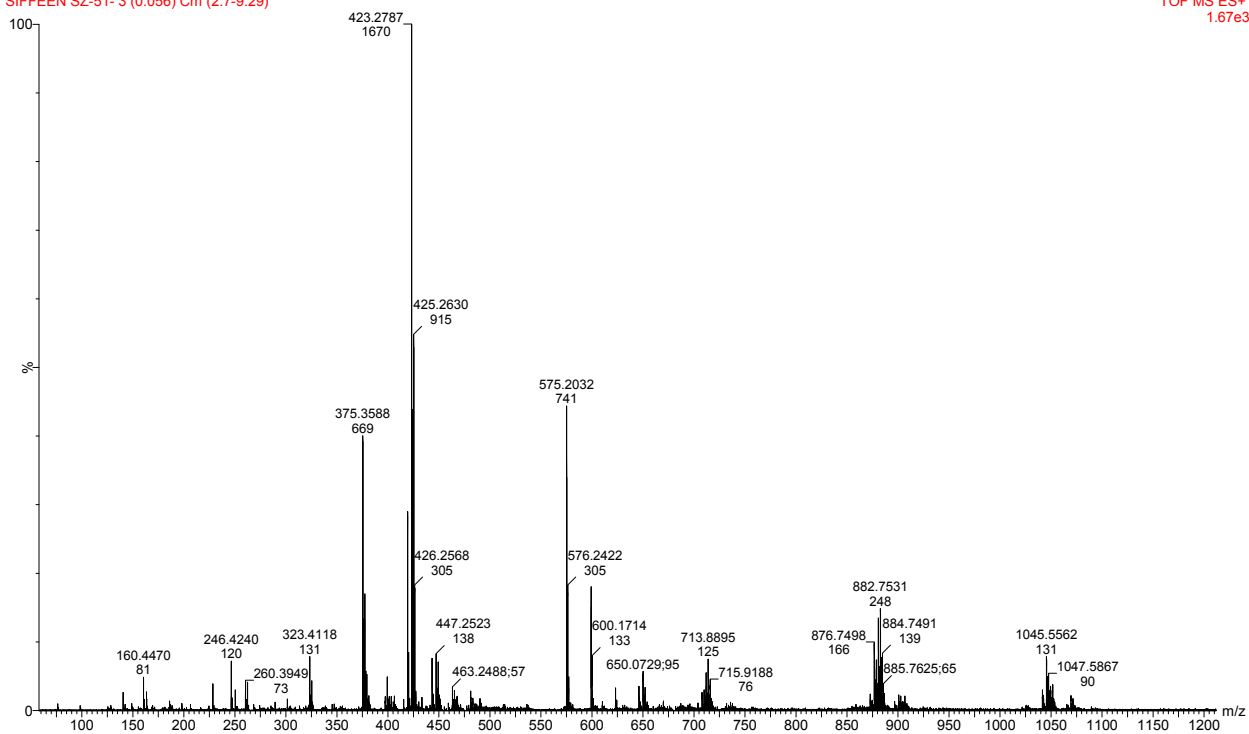

(1)

WATERS,Q-TOF MICROMASS (ESI-MS)  
SIFFEEN SZ-52- 3 (0.055) Cm (2:7-13:27)

SAIF/CIL,PANJAB UNIVERSITY,CHANDIGARH  
TOF MS ES+  
4.87e3

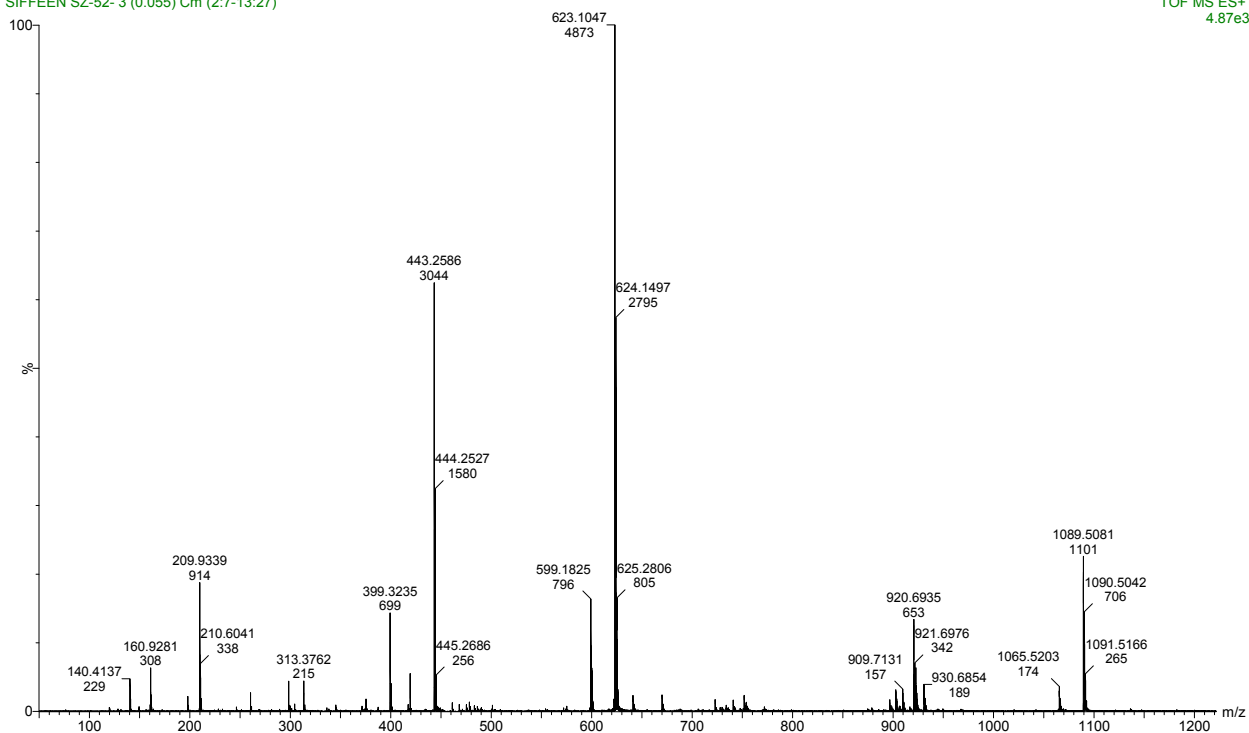

(2)

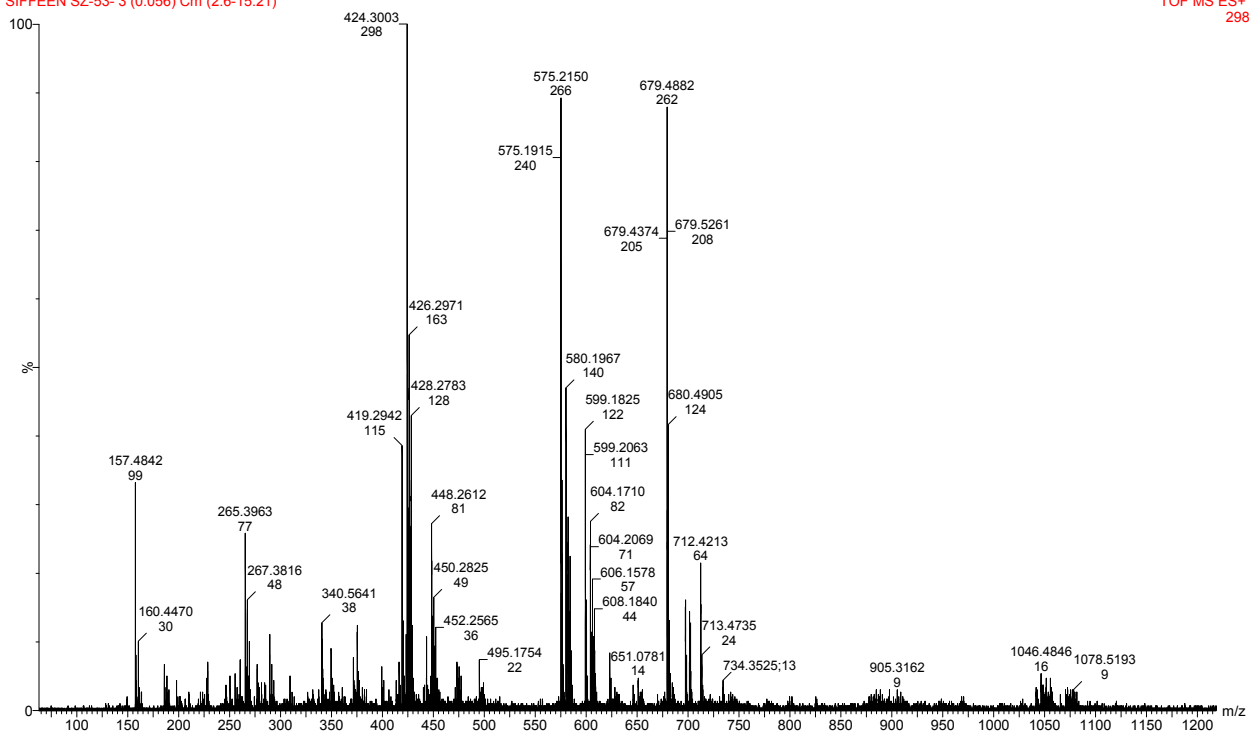

(3)

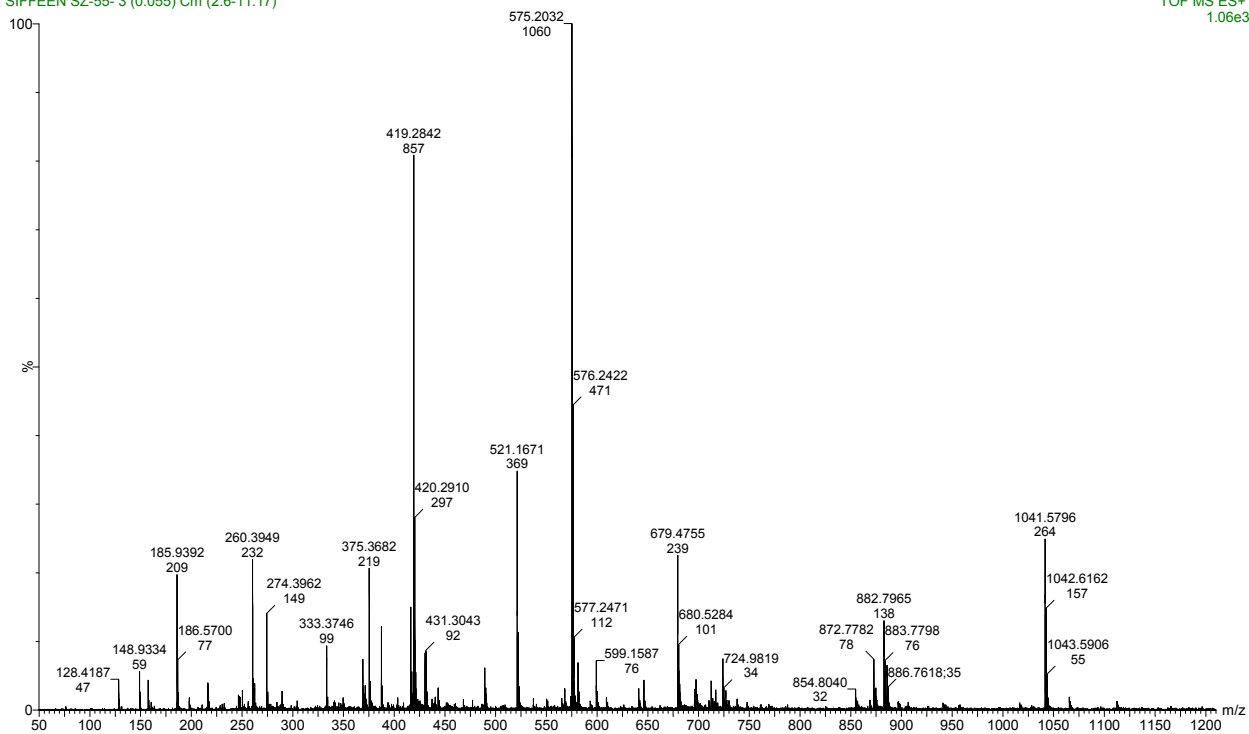

(4)

Fig. S2. Mass spectra of complexes 1–4.

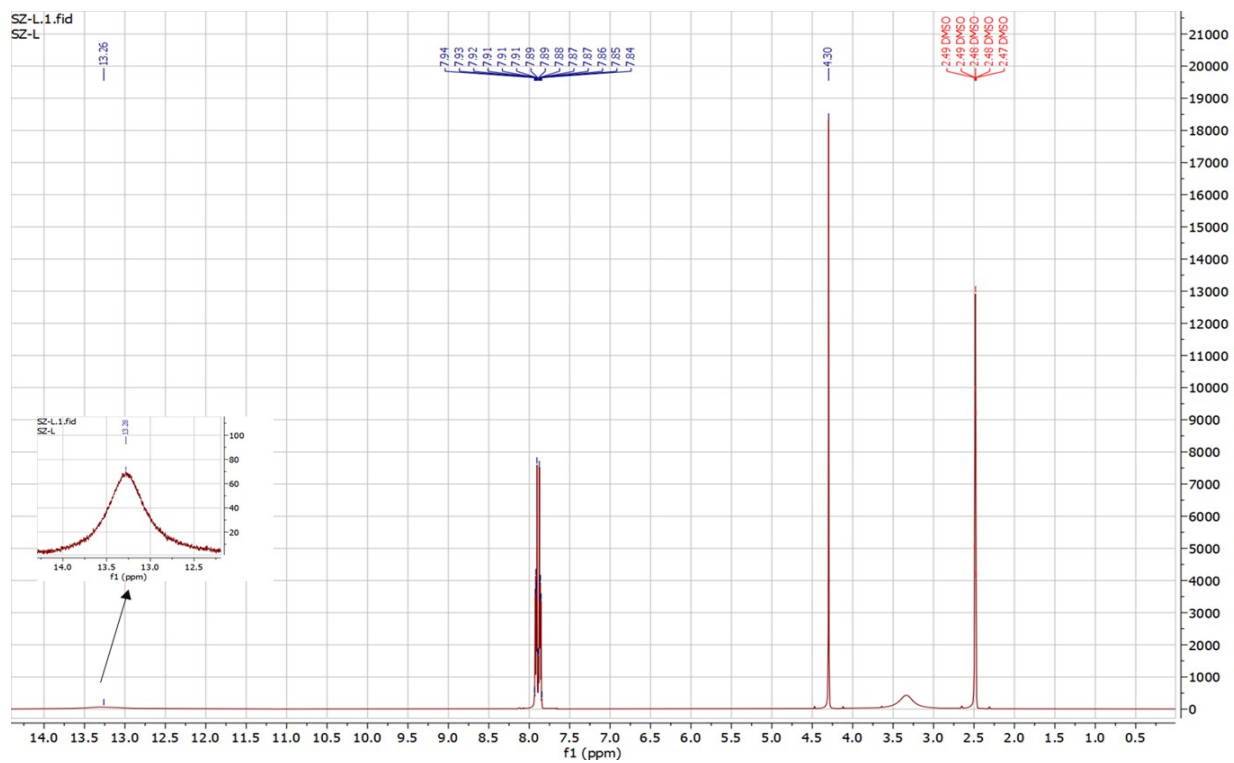

(a)

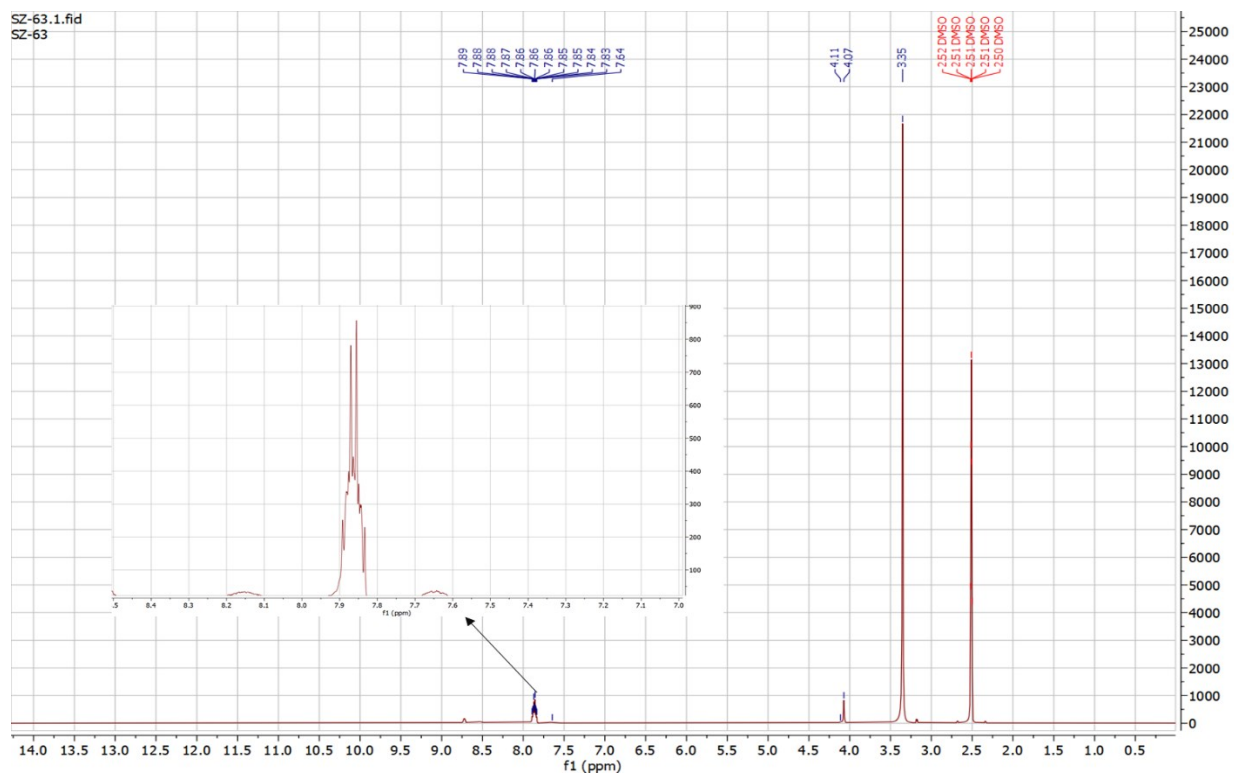

(b)

Fig. S3.  $^1\text{H}$  spectra of the (a) ligand Phthaloylglycine and (b) complex **3**.

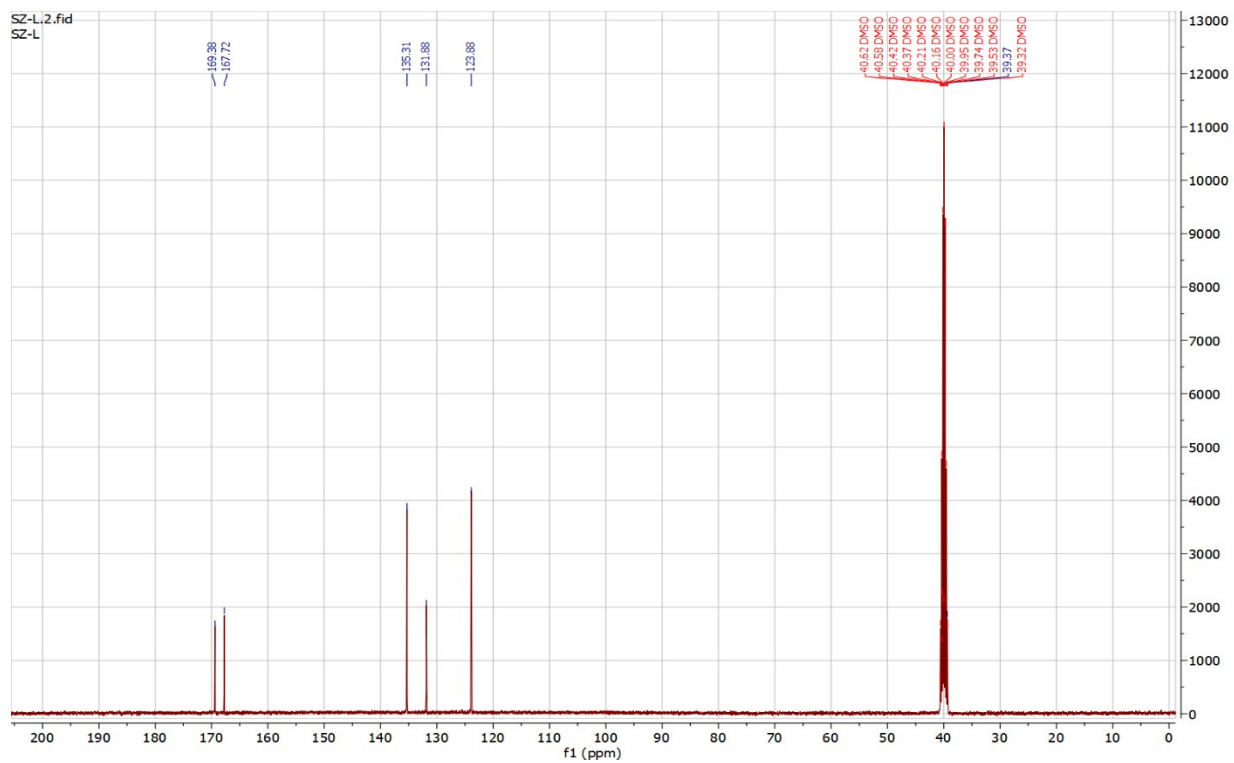

(a)

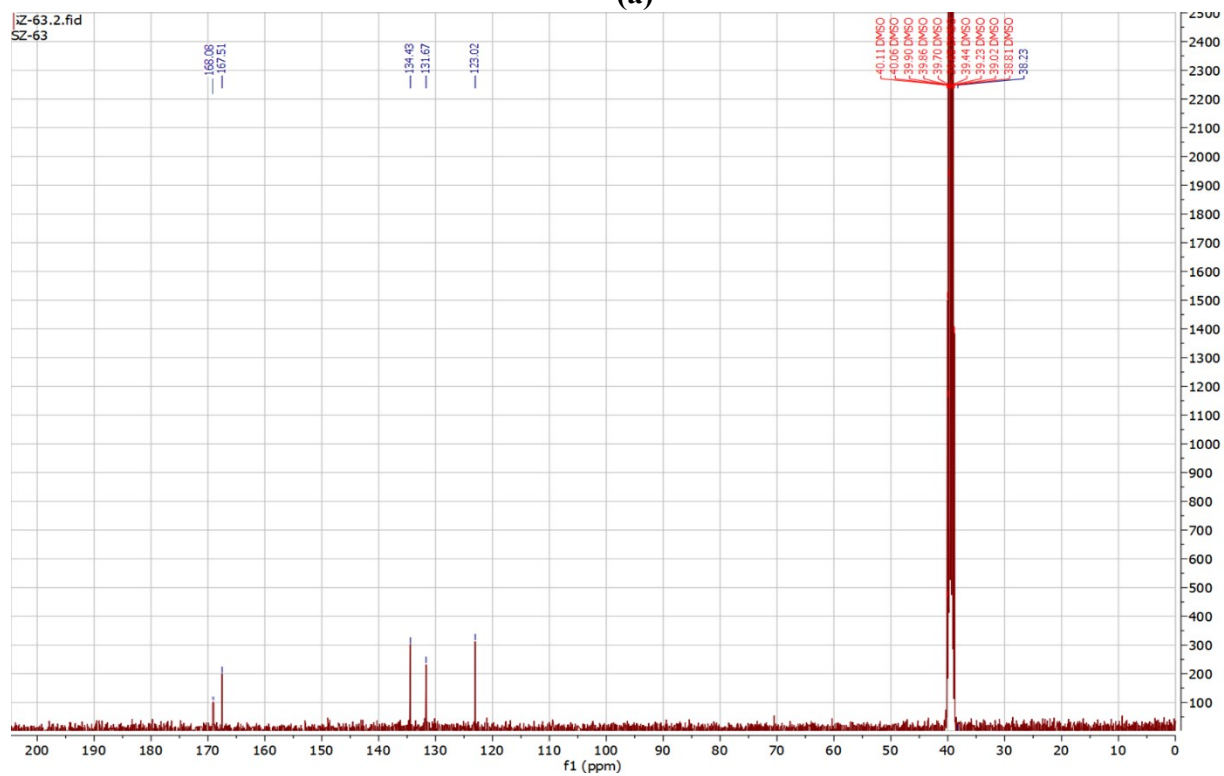

(b)

**Fig.S4.**  $^{13}\text{C}$  NMR spectra of the (a) ligand Phthaloylglycine and (b) complex **3**.

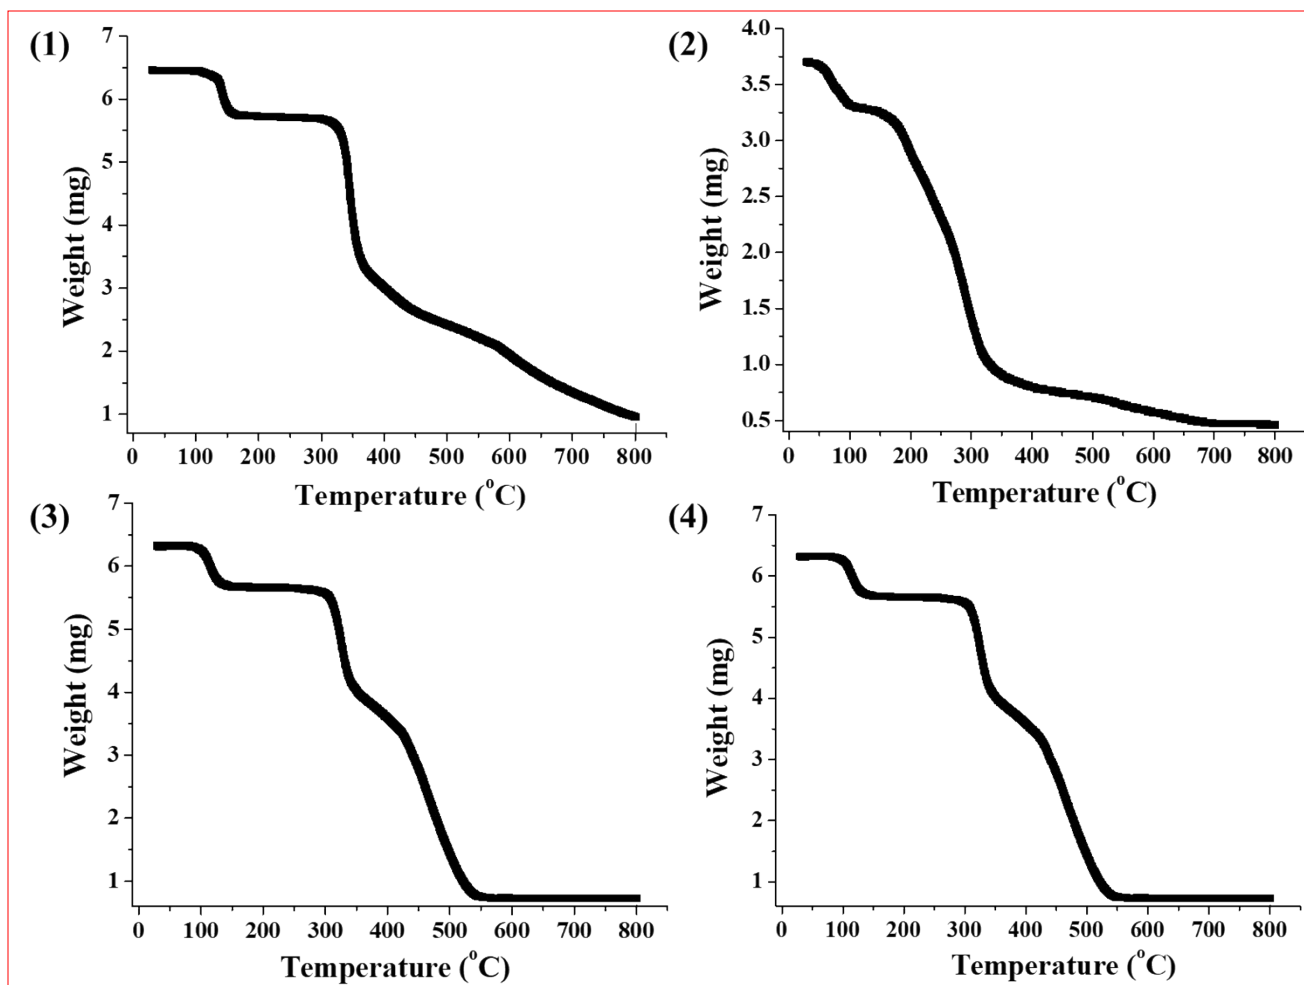

Fig.S5. Thermogravimetric analysis (TGA) curves for complexes 1–4.

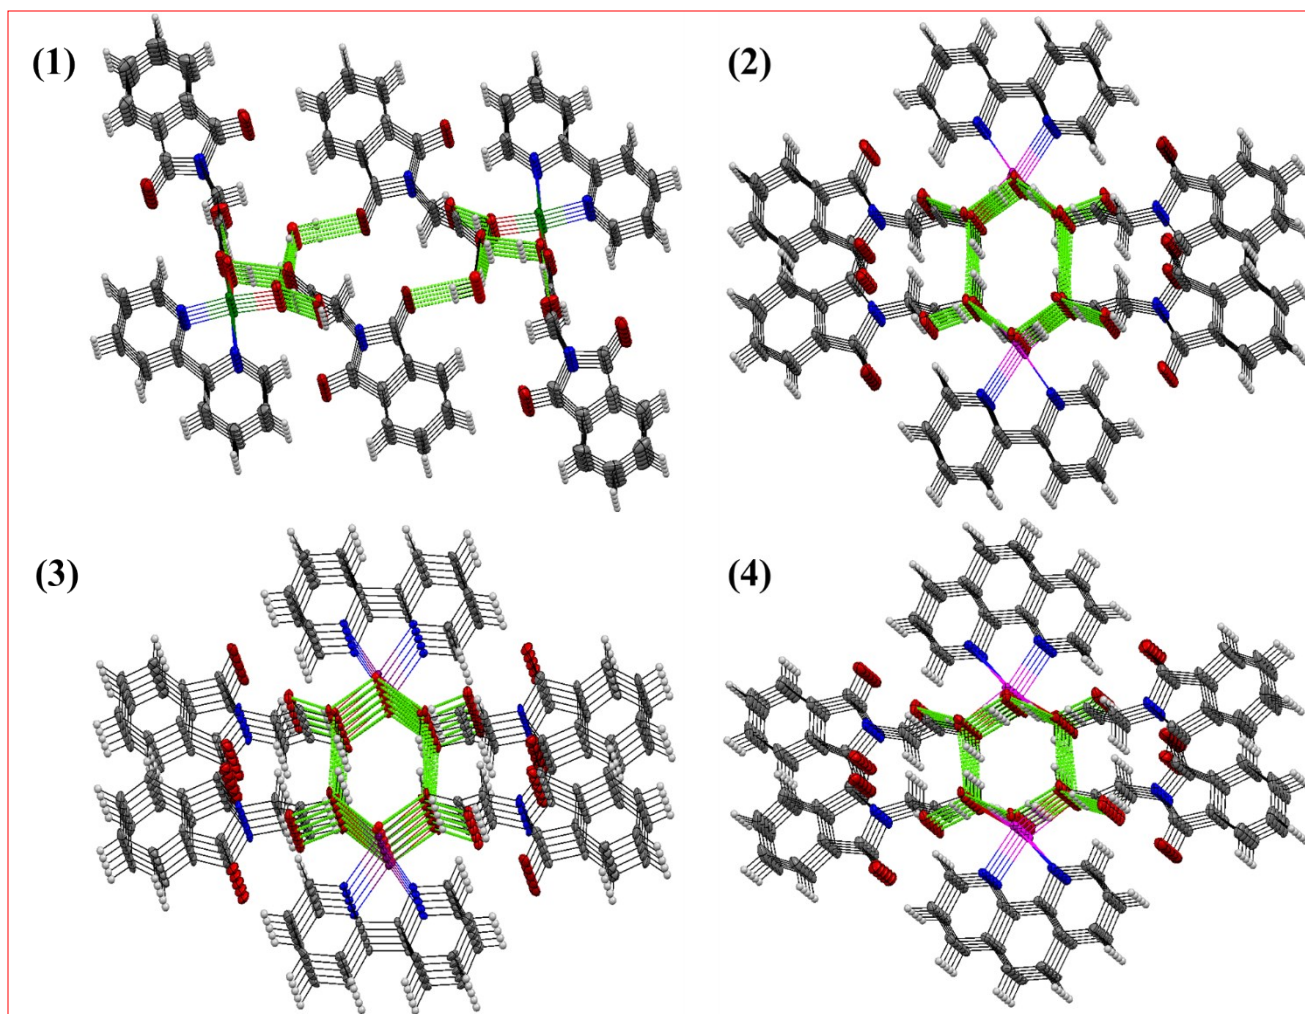

**Fig. S6.** Intermolecular C–H---O hydrogen bonding (shown by green color) resulting in 2–dimensional architectures in complexes 1–4.

**Table S1.** Crystallographic data of complexes 1–4.

| <b>Complex</b>                                   | <b>1</b>                                                         | <b>2</b>                                                         | <b>3</b>                                                          | <b>4</b>                                                         |
|--------------------------------------------------|------------------------------------------------------------------|------------------------------------------------------------------|-------------------------------------------------------------------|------------------------------------------------------------------|
| CCDC                                             | 1965359                                                          | 1965362                                                          | 1965360                                                           | 1965363                                                          |
| Empirical formula                                | C <sub>30</sub> H <sub>26</sub> CuN <sub>4</sub> O <sub>13</sub> | C <sub>30</sub> H <sub>28</sub> CoN <sub>4</sub> O <sub>12</sub> | C <sub>30</sub> H <sub>24</sub> N <sub>4</sub> O <sub>12</sub> Zn | C <sub>32</sub> H <sub>28</sub> CoN <sub>4</sub> O <sub>12</sub> |
| <i>F<sub>w</sub></i> (g mol <sup>-1</sup> )      | 714.10                                                           | 695.49                                                           | 697.92                                                            | 719.51                                                           |
| Temperature (K)                                  | 150                                                              | 150                                                              | 150                                                               | 150                                                              |
| Crystal system                                   | Triclinic                                                        | Monoclinic                                                       | Monoclinic                                                        | Monoclinic                                                       |
| Space group                                      | <i>P</i> -1                                                      | <i>C</i> 2/ <i>c</i>                                             | <i>C</i> 2/ <i>c</i>                                              | <i>C</i> 2/ <i>c</i>                                             |
| <i>a</i> (Å)                                     | 7.1549(6)                                                        | 32.8560(15)                                                      | 32.858(3)                                                         | 32.6329(15)                                                      |
| <i>b</i> (Å)                                     | 13.9178(9)                                                       | 12.1150(6)                                                       | 12.1027(10)                                                       | 12.9695(4)                                                       |
| <i>c</i> (Å)                                     | 16.9211(12)                                                      | 7.2898(3)                                                        | 7.3119(9)                                                         | 7.2447(3)                                                        |
| α (°)                                            | 110.138(2)                                                       | 90                                                               | 90                                                                | 90                                                               |
| β (°)                                            | 100.826(3)                                                       | 94.678(2)                                                        | 94.642(4)                                                         | 94.143(2)                                                        |
| γ (°)                                            | 91.382(2)                                                        | 90                                                               | 90                                                                | 90                                                               |
| Volume (Å <sup>3</sup> )                         | 1546.6(2)                                                        | 2892.0(2)                                                        | 2898.2(5)                                                         | 3058.2(2)                                                        |
| <i>Z</i>                                         | 2                                                                | 4                                                                | 4                                                                 | 4                                                                |
| ρ <sub>calc</sub> (g cm <sup>-3</sup> )          | 1.533                                                            | 1.597                                                            | 1.599                                                             | 1.563                                                            |
| μ (mm <sup>-1</sup> )                            | 0.781                                                            | 0.670                                                            | 0.923                                                             | 0.636                                                            |
| <i>F</i> (000)                                   | 734                                                              | 1436                                                             | 1432                                                              | 1484                                                             |
| Crystal size (mm)                                | 0.21x0.15x0.15                                                   | 0.16 x 0.12x 0.12                                                | 0.19x 0.18 x 0.15                                                 | 0.18x 0.18 x 0.17                                                |
| θ Range (°)                                      | 2.373–26.441                                                     | 2.488–28.818                                                     | 2.488–26.431                                                      | 2.488–25.242                                                     |
| Completeness (%)                                 | 0.998                                                            | 0.987                                                            | 0.998                                                             | 0.998                                                            |
| Measured reflections                             | 26494                                                            | 23999                                                            | 21318                                                             | 41234                                                            |
| Independent reflections/ <i>R</i> <sub>int</sub> | 6347/0.1127                                                      | 3722/ 0.0419                                                     | 2985/0.1268                                                       | 3955/0.0395                                                      |
| Observed reflectios [I>2σ(I)]                    | 4668                                                             | 3303                                                             | 2370                                                              | 3623                                                             |
| Data / restraints / parameters                   | /9/442                                                           | 3722 / 6 / 229                                                   | 2985 /3/216                                                       | 3955/6/238                                                       |
| Goodness-of-fit on <i>F</i> <sup>2</sup>         | 1.019                                                            | 1.061                                                            | 1.185                                                             | 1.065                                                            |
| Final indices [I>2σ(I)]                          | R1 = 0.0587<br>wR2 = 0.1351                                      | R1 = 0.0279<br>wR2 = 0.0662                                      | R1 = 0.0743<br>wR2 = 0.1750                                       | R1 = 0.0269<br>wR2 = 0.0724                                      |
| <i>R</i> indices (all data)                      | R1 = 0.0901<br>wR2 = 0.1522                                      | R1 = 0.0343<br>wR2 = 0.0689                                      | R1 = 0.0975<br>wR2 = 0.1850                                       | R1 = 0.0300<br>wR2 = 0.0740                                      |
| Largest diff. peak/hole (eÅ <sup>-3</sup> )      | 1.438/–1.024                                                     | 0.366/–0.376                                                     | 2.456/–0.893                                                      | 0.265/–0.541                                                     |

**Table S2.** Selected bond length of complexes 1–4 in Angstrom (Å).

| <b>Complex 1</b> |                        |              |                        |
|------------------|------------------------|--------------|------------------------|
| <b>Atoms</b>     | <b>Bond length (Å)</b> | <b>Atoms</b> | <b>Bond length (Å)</b> |
| Cu1–N1           | 2.016(3)               | O7–C21       | 1.254(5)               |



|                  |                        |              |                        |
|------------------|------------------------|--------------|------------------------|
| Cu1–N2           | 1.990(3)               | O8–C21       | 1.246(5)               |
| Cu1–O1           | 1.954(3)               | O5–H5O(A)    | 0.944(19)              |
| Cu1–O5           | 1.950(3)               | O6–H6O(B)    | 0.929(19)              |
| Cu1–O6           | 2.261(3)               | O6–H6O(A)    | 0.931(19)              |
| O1–C11           | 1.281(5)               | O5–H5O(B)    | 0.930(19)              |
| O2–C11           | 1.225(5)               |              |                        |
| <b>Complex 2</b> |                        |              |                        |
| <b>Atoms</b>     | <b>Bond length (Å)</b> | <b>Atoms</b> | <b>Bond length (Å)</b> |
| Co1–N1           | 2.1380(11)             | O1–C6        | 1.2362(16)             |
| Co1–O5           | 2.0606(9)              | O2–C6        | 1.2807(16)             |
| Co1–O6           | 2.1227(10)             |              |                        |
| <b>Complex 3</b> |                        |              |                        |
| <b>Atoms</b>     | <b>Bond length (Å)</b> | <b>Atoms</b> | <b>Bond length (Å)</b> |
| Zn1–O6           | 2.117(4)               | O1–C6        | 1.290(7)               |
| Zn1–O5           | 2.125(4)               | O2–C6        | 1.227(7)               |
| Zn1–N1           | 2.157(4)               |              |                        |
| <b>Complex 4</b> |                        |              |                        |
| <b>Atoms</b>     | <b>Bond length (Å)</b> | <b>Atoms</b> | <b>Bond length (Å)</b> |
| Co1–O5           | 2.0228(9)              | O1–C7        | 1.2342(15)             |
| Co1–N1           | 2.1632(10)             | O2–C7        | 1.2809(13)             |
| Co1–O6           | 2.1634(8)              |              |                        |

**Table S3.** Selected bond angles of complexes 1–4 in degree (°).

|                  |                       |              |                       |
|------------------|-----------------------|--------------|-----------------------|
| <b>Complex 1</b> |                       |              |                       |
| <b>Atoms</b>     | <b>Bond angle (°)</b> | <b>Atoms</b> | <b>Bond angle (°)</b> |
| O5–Cu1–O1        | 89.65(11)             | Cu1–O5–H5OA  | 119(3)                |
| O5–Cu1–N2        | 173.65(12)            | Cu1–O5–H5OB  | 109(3)                |
| O1–Cu1–N2        | 94.18(12)             | Cu1–O6–H6OA  | 90(3)                 |
| O5–Cu1–N1        | 93.28(12)             | Cu1–O6–H6OB  | 113(4)                |
| O1–Cu1–N1        | 154.55(12)            | C1–N1–C5     | 119.7(3)              |
| N2–Cu1–N1        | 81.09(12)             | C1–N1–Cu1    | 126.0(3)              |
| O5–Cu1–O6        | 95.70(11)             | C5–N1–Cu1    | 114.2(2)              |
| O1–Cu1–O6        | 101.45(11)            | C10–N2–C6    | 118.8(3)              |
| N2–Cu1–O6        | 88.51(11)             | C10–N2–Cu1   | 125.5(3)              |
| N1–Cu1–O6        | 103.40(12)            | C6–N2–Cu1    | 115.5(2)              |
| C11–O1–Cu1       | 122.6(2)              |              |                       |
| <b>Complex 2</b> |                       |              |                       |
| <b>Atoms</b>     | <b>Bond angle (°)</b> | <b>Atoms</b> | <b>Bond angle (°)</b> |
| O5–Co1–O5        | 170.27(6)             | O5–Co1–N1    | 89.87(4)              |
| O5–Co1–O6        | 87.04(4)              | O6–Co1–N1    | 166.51(4)             |
| O5–Co1–O6        | 86.90(4)              | O6–Co1–N1    | 89.91(4)              |
| O6–Co1–O6        | 102.98(6)             | Co1–O6–H6OB  | 123.0(14)             |
| O5–Co1–N1        | 97.73(4)              | N1–Co1–N1    | 77.53(6)              |
| Co1–O5–H5OA      | 118.3(13)             | C5–N1–C1     | 118.43(11)            |
| Co1–O5–H5OB      | 117.7(14)             | C5–N1–Co1    | 126.16(9)             |

|                  |                       |              |                       |
|------------------|-----------------------|--------------|-----------------------|
| Co1–O6–H6OA      | 114.9(13)             | C1–N1–Co1    | 115.16(9)             |
| <b>Complex 3</b> |                       |              |                       |
| <b>Atoms</b>     | <b>Bond angle (°)</b> | <b>Atoms</b> | <b>Bond angle (°)</b> |
| O6–Zn1–O6        | 105.5(2)              | O5–Zn1–N1    | 97.83(15)             |
| O6–Zn1–O5        | 87.39(15)             | N1–Zn1–N1    | 76.4(2)               |
| O6–Zn1–O5        | 86.74(15)             | Zn1–O6–H6OA  | 120(4)                |
| O5–Zn1–O5        | 170.3(2)              | Zn1–O6–H6OB  | 108(4)                |
| O6–Zn1–N1        | 89.30(16)             | C1–N1–C5     | 118.6(5)              |
| O6–Zn1–N1        | 164.66(16)            | C1–N1–Zn1    | 115.8(3)              |
| O5–Zn1–N1        | 89.80(15)             | C5–N1–Zn1    | 125.4(4)              |
| <b>Complex 4</b> |                       |              |                       |
| <b>Atoms</b>     | <b>Bond angle (°)</b> | <b>Atoms</b> | <b>Bond angle (°)</b> |
| O5–Co1–O5        | 157.24(6)             | O6–Co1–O6    | 112.72(5)             |
| O5–Co1–N1        | 104.96(4)             | Co1–O5–H5OA  | 122.2(13)             |
| O5–Co1–N1        | 92.81(4)              | Co1–O5–H5OB  | 122.1(13)             |
| N1–Co1–N1        | 77.76(5)              | Co1–O6–H6OA  | 118.2(14)             |
| O5–Co1–O6        | 84.17(3)              | Co1–O6–H6OB  | 113.9(13)             |
| O5–Co1–O6        | 83.28(3)              | C5–N1–C1     | 117.79(10)            |
| N1–Co1–O6        | 85.15(4)              | C5–N1–Co1    | 128.77(8)             |
| N1–Co1–O6        | 161.27(4)             | C1–N1–Co1    | 113.30(7)             |

**Table S4.** Simulated data for the bond length of complexes 1–4 in Angstrom (Å).

|                  |                        |             |              |                        |             |
|------------------|------------------------|-------------|--------------|------------------------|-------------|
| <b>Complex 1</b> |                        |             |              |                        |             |
| <b>Atoms</b>     | <b>Bond length (Å)</b> |             | <b>Atoms</b> | <b>Bond length (Å)</b> |             |
|                  | <b>Exp.</b>            | <b>Obs.</b> |              | <b>Exp.</b>            | <b>Obs.</b> |
| Cu1–N1           | 2.016                  | 2.066       | O7–C21       | 1.254                  | 1.240       |
| Cu1–N2           | 1.990                  | 2.057       | O8–C21       | 1.246                  | 1.263       |
| Cu1–O1           | 1.954                  | 1.962       | O5–H5O(A)    | 0.944                  | 0.873       |
| Cu1–O5           | 1.950                  | 1.999       | O6–H6O(B)    | 0.929                  | 1.064       |
| Cu1–O6           | 2.261                  | 2.199       | O6–H6O(A)    | 0.931                  | 0.970       |
| O1–C11           | 1.281                  | 1.284       | O5–H5O(B)    | 0.930                  | 0.875       |
| O2–C11           | 1.225                  | 1.227       |              |                        |             |
| <b>Complex 2</b> |                        |             |              |                        |             |
| <b>Atoms</b>     | <b>Bond length (Å)</b> |             | <b>Atoms</b> | <b>Bond length (Å)</b> |             |
|                  | <b>Exp.</b>            | <b>Obs.</b> |              | <b>Exp.</b>            | <b>Obs.</b> |
| Co1–N1           | 2.1380                 | 1.889       | O1–C6        | 1.2362                 | 1.241       |
| Co1–O5           | 2.0606                 | 2.046       | O2–C6        | 1.2807                 | 1.243       |
| Co1–O6           | 2.1227                 | 2.315       |              |                        |             |
| <b>Complex 3</b> |                        |             |              |                        |             |
| <b>Atoms</b>     | <b>Bond length (Å)</b> |             | <b>Atoms</b> | <b>Bond length (Å)</b> |             |
|                  | <b>Exp.</b>            | <b>Obs.</b> |              | <b>Exp.</b>            | <b>Obs.</b> |
| Zn1–O6           | 2.117                  | 2.211       | O1–C6        | 1.290                  | 1.296       |
| Zn1–O5           | 2.125                  | 2.069       | O2–C6        | 1.227                  | 1.214       |
| Zn1–N1           | 2.157                  | 2.130       |              |                        |             |

| Complex 4 |                 |        |       |                 |        |
|-----------|-----------------|--------|-------|-----------------|--------|
| Atoms     | Bond length (Å) |        | Atoms | Bond length (Å) |        |
|           | Exp.            | Obs.   |       | Exp.            | Obs.   |
| Co1–O5    | 2.0228          | 2.0228 | O1–C7 | 1.2342          | 1.2341 |
| Co1–N1    | 2.1632          | 2.1631 | O2–C7 | 1.2809          | 1.2808 |
| Co1–O6    | 2.1634          | 2.1632 |       |                 |        |

**Table S5.** Simulated data for the bond angles of complexes 1–4 in degree (°).

| Complex 1  |                |        |             |                |        |
|------------|----------------|--------|-------------|----------------|--------|
| Atoms      | Bond angle (°) |        | Atoms       | Bond angle (°) |        |
|            | Exp.           | Obs.   |             | Exp.           | Obs.   |
| O5–Cu1–O1  | 89.65          | 88.51  | Cu1–O5–H5OA | 119            | 118.21 |
| O5–Cu1–N2  | 173.65         | 173.71 | Cu1–O5–H5OB | 109            | 109.47 |
| O1–Cu1–N2  | 94.18          | 94.80  | Cu1–O6–H6OA | 90             | 90.47  |
| O5–Cu1–N1  | 93.28          | 93.71  | Cu1–O6–H6OB | 113            | 113.83 |
| O1–Cu1–N1  | 154.55         | 155.71 | C1–N1–C5    | 119.7          | 119.97 |
| N2–Cu1–N1  | 81.09          | 79.58  | C1–N1–Cu1   | 126.0          | 125.57 |
| O5–Cu1–O6  | 95.70          | 99.85  | C5–N1–Cu1   | 114.2          | 114.32 |
| O1–Cu1–O6  | 101.45         | 101.72 | C10–N2–C6   | 118.8          | 120.25 |
| N2–Cu1–O6  | 88.51          | 88.51  | C10–N2–Cu1  | 125.5          | 124.74 |
| N1–Cu1–O6  | 103.40         | 102.57 | C6–N2–Cu1   | 115.5          | 114.63 |
| C11–O1–Cu1 | 122.6          | 123.99 |             |                |        |
| Complex 2  |                |        |             |                |        |
| Atoms      | Bond angle (°) |        | Atoms       | Bond angle (°) |        |
|            | Exp.           | Obs.   |             | Exp.           | Obs.   |
| O5–Co1–O5  | 170.27         | 170.20 | N1–Co1–N1   | 77.53          | 75.40  |
| O5–Co1–O6  | 87.04          | 87.65  | Co1–O5–H5OA | 118.3          | 119.47 |
| O5–Co1–O6  | 86.90          | 88.42  | Co1–O5–H5OB | 117.7          | 118.05 |
| O6–Co1–O6  | 102.98         | 101.13 | Co1–O6–H6OA | 114.9          | 114.97 |
| O5–Co1–N1  | 89.87          | 90.19  | Co1–O6–H6OB | 123.0          | 120.75 |
| O5–Co1–N1  | 97.73          | 98.10  | C5–N1–C1    | 118.43         | 117.62 |
| O6–Co1–N1  | 89.92          | 89.02  | C5–N1–Co1   | 126.16         | 126.75 |
| O6–Co1–N1  | 166.50         | 166.99 | C1–N1–Co1   | 115.16         | 114.52 |
| Complex 3  |                |        |             |                |        |
| Atoms      | Bond angle (°) |        | Atoms       | Bond angle (°) |        |
|            | Exp.           | Obs.   |             | Exp.           | Obs.   |
| O6–Zn1–O6  | 105.5          | 104.47 | O5–Zn1–N1   | 89.80          | 89.86  |
| O6–Zn1–O5  | 87.39          | 87.28  | N1–Zn1–N1   | 76.4           | 79.06  |
| O6–Zn1–O5  | 86.74          | 87.09  | Zn1–O6–H6OA | 120            | 120.27 |
| O5–Zn1–O5  | 170.3          | 169.22 | Zn1–O6–H6OB | 108            | 109.47 |
| O6–Zn1–N1  | 164.66         | 164.18 | C1–N1–C5    | 118.6          | 119.24 |
| O6–Zn1–N1  | 89.30          | 90.93  | C1–N1–Zn1   | 115.8          | 112.99 |
| O5–Zn1–N1  | 97.83          | 96.01  | C5–N1–Zn1   | 125.4(4)       | 127.52 |
| Complex 4  |                |        |             |                |        |
| Atoms      | Bond angle (°) |        | Atoms       | Bond angle (°) |        |

|           | Exp.   | Obs.   |             | Exp.   | Obs.   |
|-----------|--------|--------|-------------|--------|--------|
| O5–Co1–O5 | 157.24 | 158.75 | O6–Co1–O6   | 112.72 | 112.72 |
| O5–Co1–N1 | 104.96 | 105.37 | Co1–O5–H5OA | 122.2  | 121.67 |
| O5–Co1–N1 | 92.81  | 92.80  | Co1–O5–H5OB | 122.1  | 121.17 |
| N1–Co1–N1 | 77.76  | 78.02  | Co1–O6–H6OA | 118.2  | 118.82 |
| O5–Co1–O6 | 84.17  | 84.17  | Co1–O6–H6OB | 113.9  | 113.45 |
| O5–Co1–O6 | 83.28  | 83.27  | C5–N1–C1    | 117.79 | 117.79 |
| N1–Co1–O6 | 85.15  | 85.14  | C5–N1–Co1   | 128.77 | 128.76 |
| N1–Co1–O6 | 161.27 | 161.26 | C1–N1–Co1   | 113.30 | 113.29 |

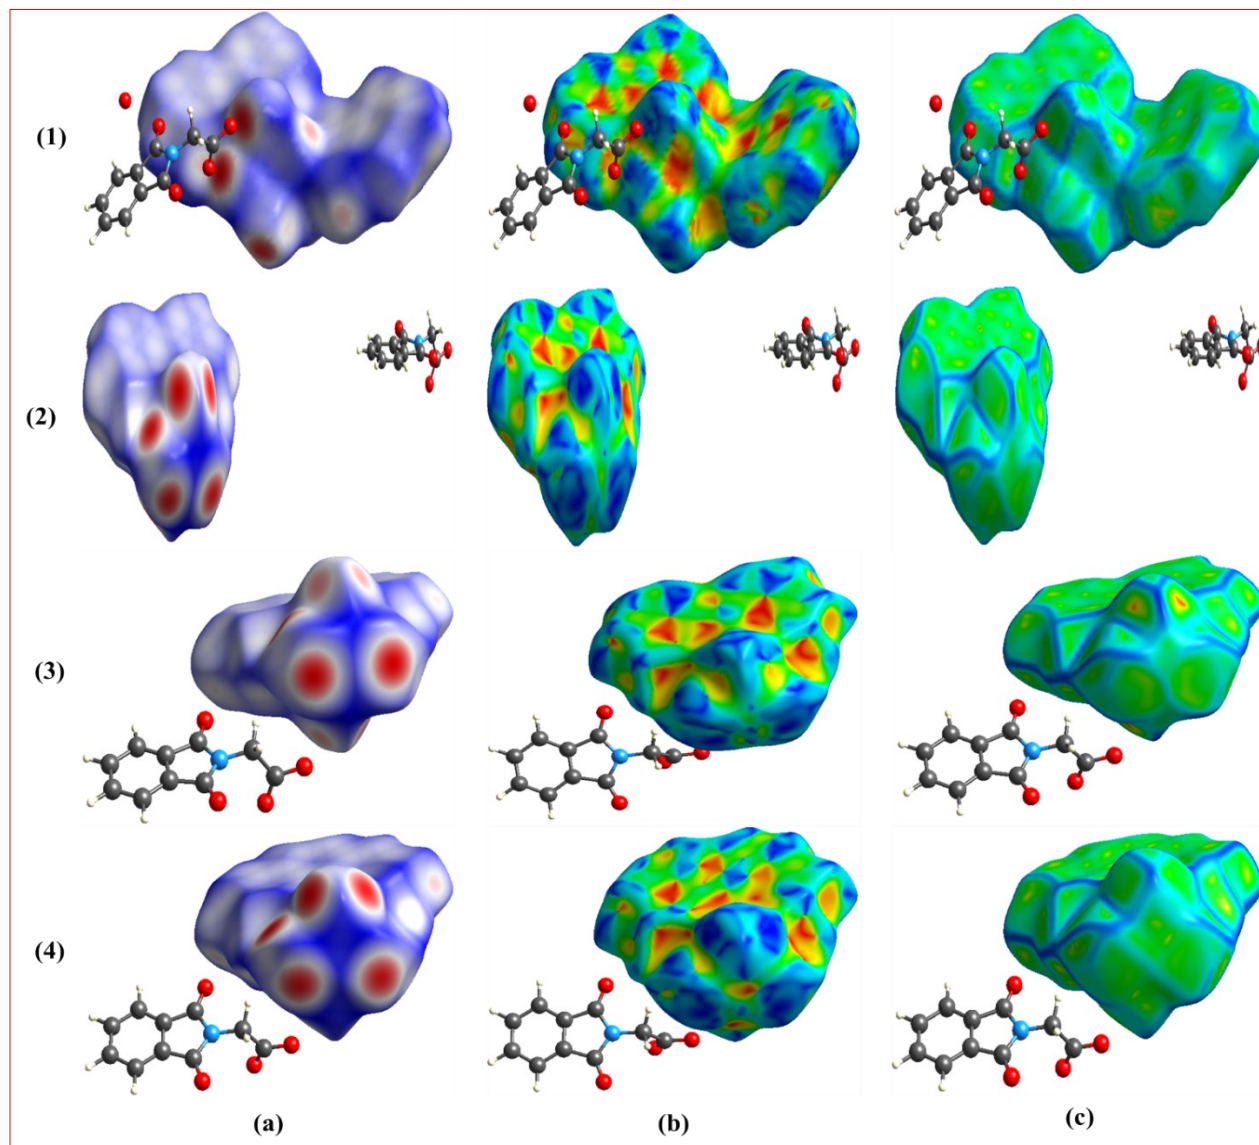

**Fig. S7.** Hirshfeld surface for complexes 1–4 (a)  $d_{\text{norm}}$  (b) shape index and (c) curvedness.

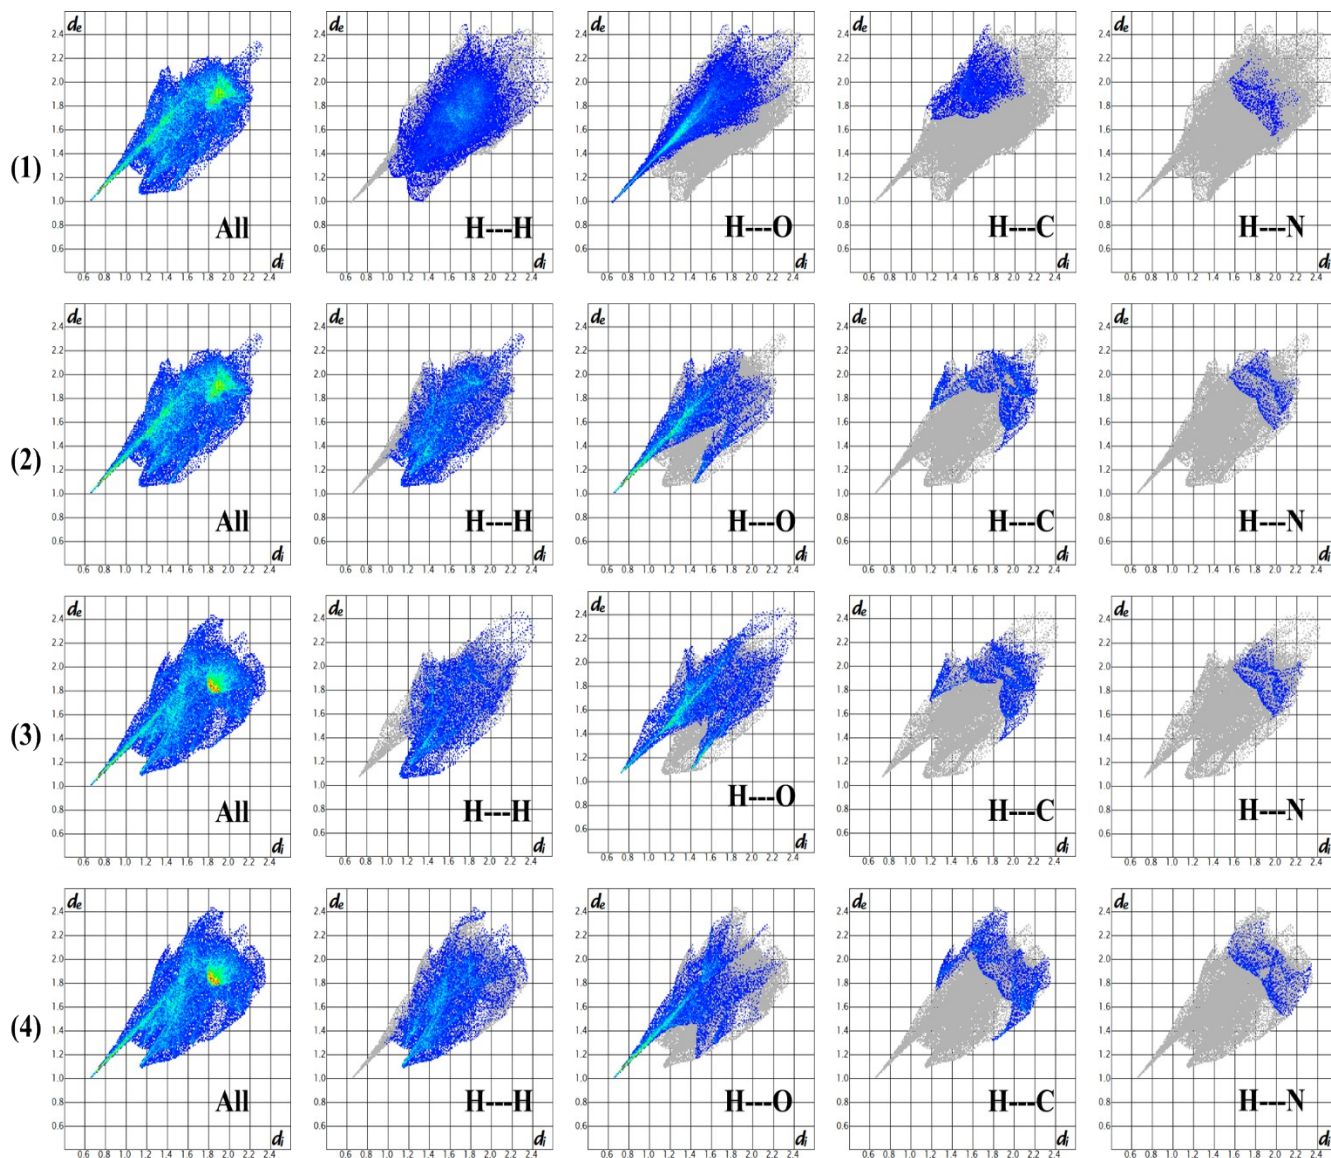

**Fig. S8.** Finger print plots for complexes 1–4 discerning the percent contribution by various inter-atomic interactions.

**Table S6.** Percentage contribution of various atomic pairs in the complexes 1–4.

| Complexes | Percent contribution (%) |      |      |     |
|-----------|--------------------------|------|------|-----|
|           | H–H                      | H–O  | H–C  | H–N |
| <b>1</b>  | 32.1                     | 37.4 | 11.3 | 1.2 |
| <b>2</b>  | 33.6                     | 41.3 | 9.1  | 2.7 |
| <b>3</b>  | 28.0                     | 39.0 | 9.1  | 3.0 |
| <b>4</b>  | 40.7                     | 29.9 | 10.4 | 3.7 |

### **Binding studies with ct-DNA and tRNA**

Absorption titrations were performed on a UV-1700 PharmaSpec UV-vis spectrophotometer (Shimadzu) with a fixed concentration of complexes **1-4** ( $1 \times 10^{-4}$  M) and varying the ct-DNA/tRNA ( $0-0.55 \times 10^{-5}$  M) concentration while the total volume remains constant. The absorbance was recorded after successive titrations upon addition of ct-DNA/tRNA solution. Fluorescent Intercalator Displacement assay was performed using a Hitachi F-250 spectrofluorometer at 25 °C. The Tris buffer was used as a blank to make preliminary adjustments. Emission spectral titrations were conducted by adding aliquots of  $0-0.6 \times 10^{-4}$  M solutions of complexes **1-4** to samples containing  $1 \mu\text{M}$  of ethidium bromide solution ( $1 \times 10^{-5}$  M) and an equimolar concentration of ct-DNA/tRNA ( $1 \times 10^{-5}$  M) in Tris-HCl buffer. Cyclic voltammetry was carried out at CH instrument electrochemical analyzer. The cyclic voltammograms were recorded for the complexes alone and then in the absence and presence of ct-DNA and tRNA ( $1 \times 10^{-5}$  M). The total volume of the solution is maintained constant by the addition of Tris-HCl buffer.



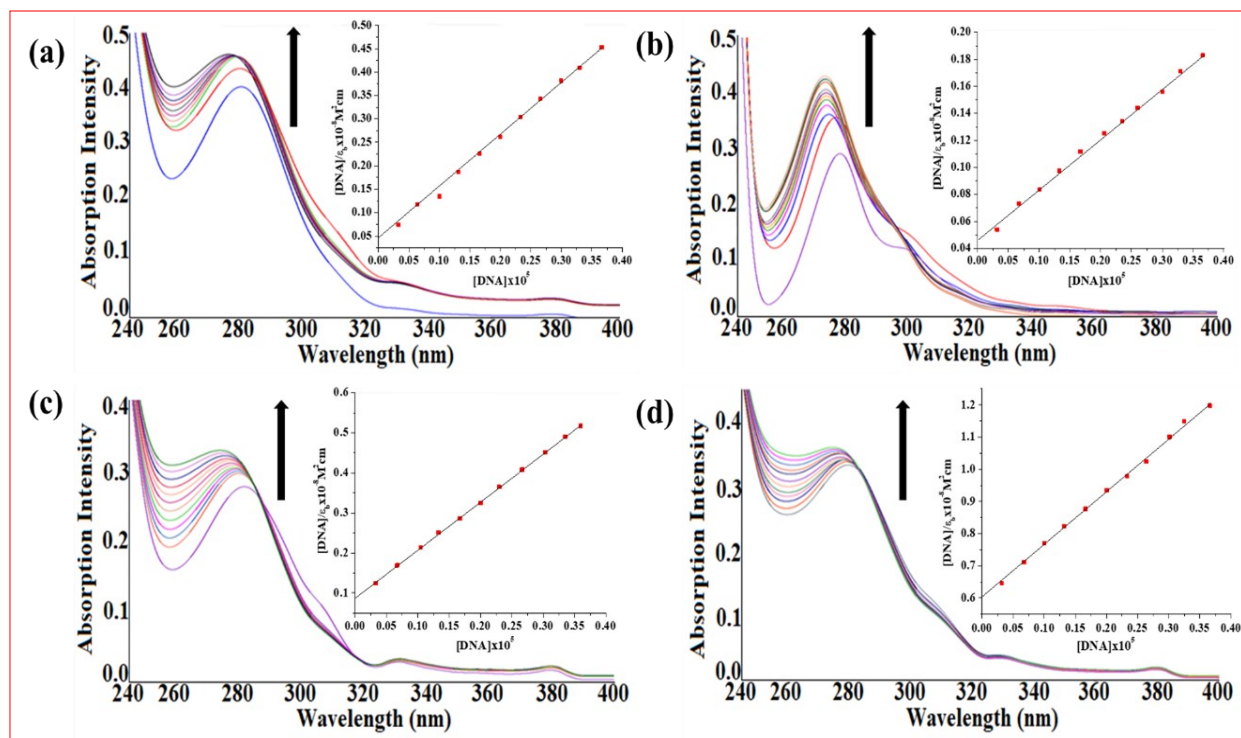

**Fig. S9.** Absorption spectra of complexes 1–4 in presence of increasing ct–DNA concentration ( $0\text{--}0.55 \times 10^{-5}$  M).

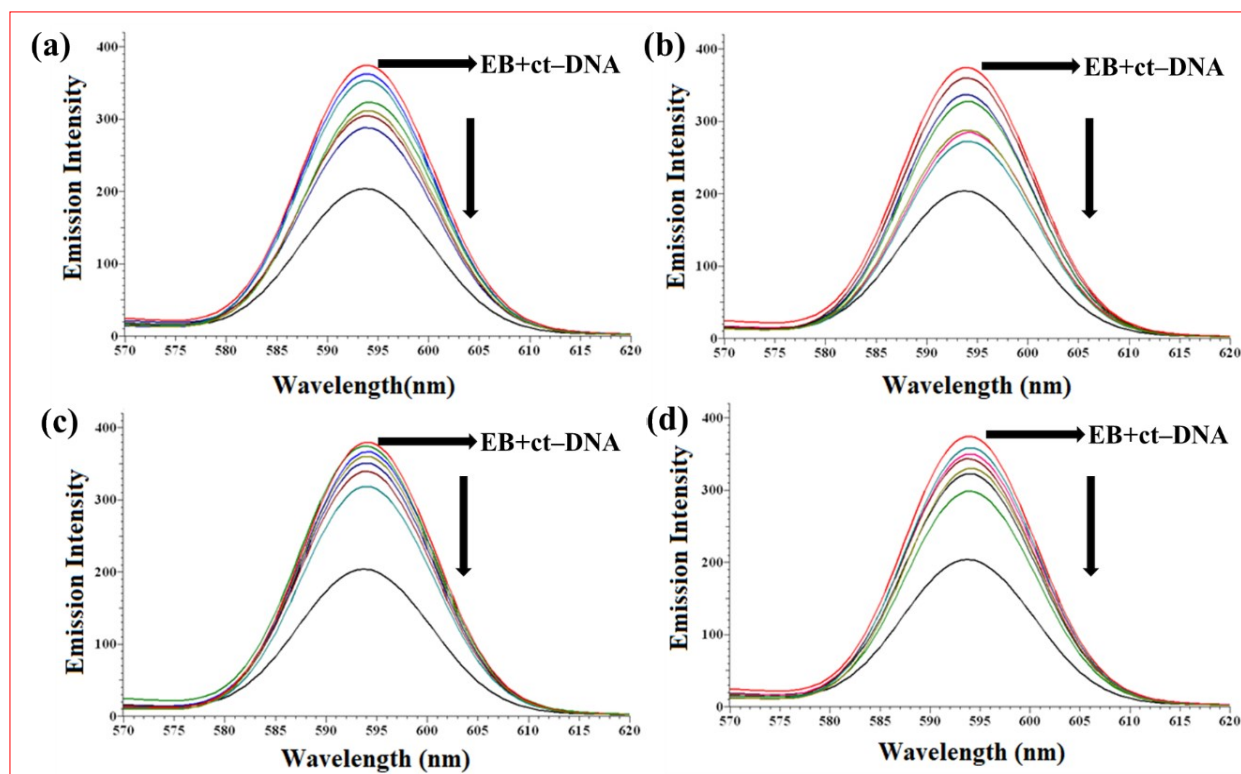

**Fig. S10.** Emission titration spectra of EB–ct–DNA system in presence of increasing concentration of complexes 1–4.

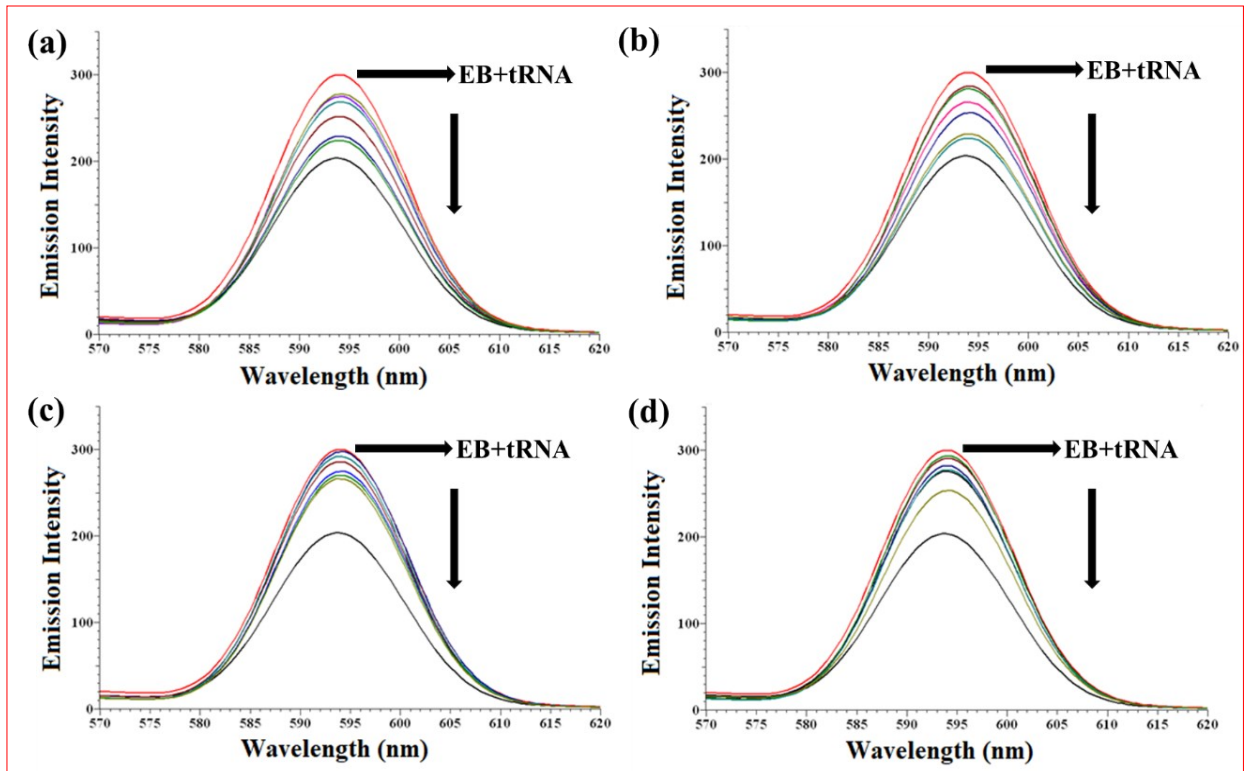

**Fig. S11.** Emission titration spectra of EB-tRNA system in presence of increasing concentration of complexes 1-4.

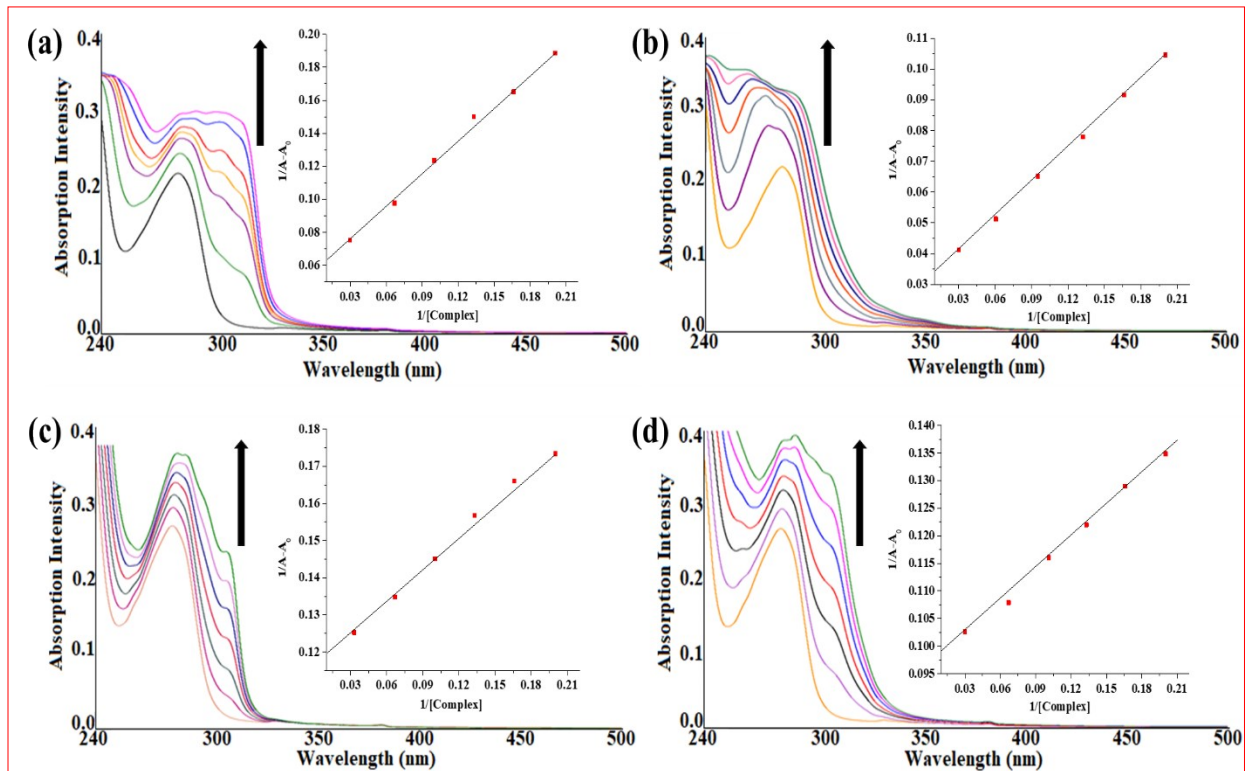

**Fig. S12.** Absorption titration spectra of BSA in presence of increasing amount of complexes 1-4.





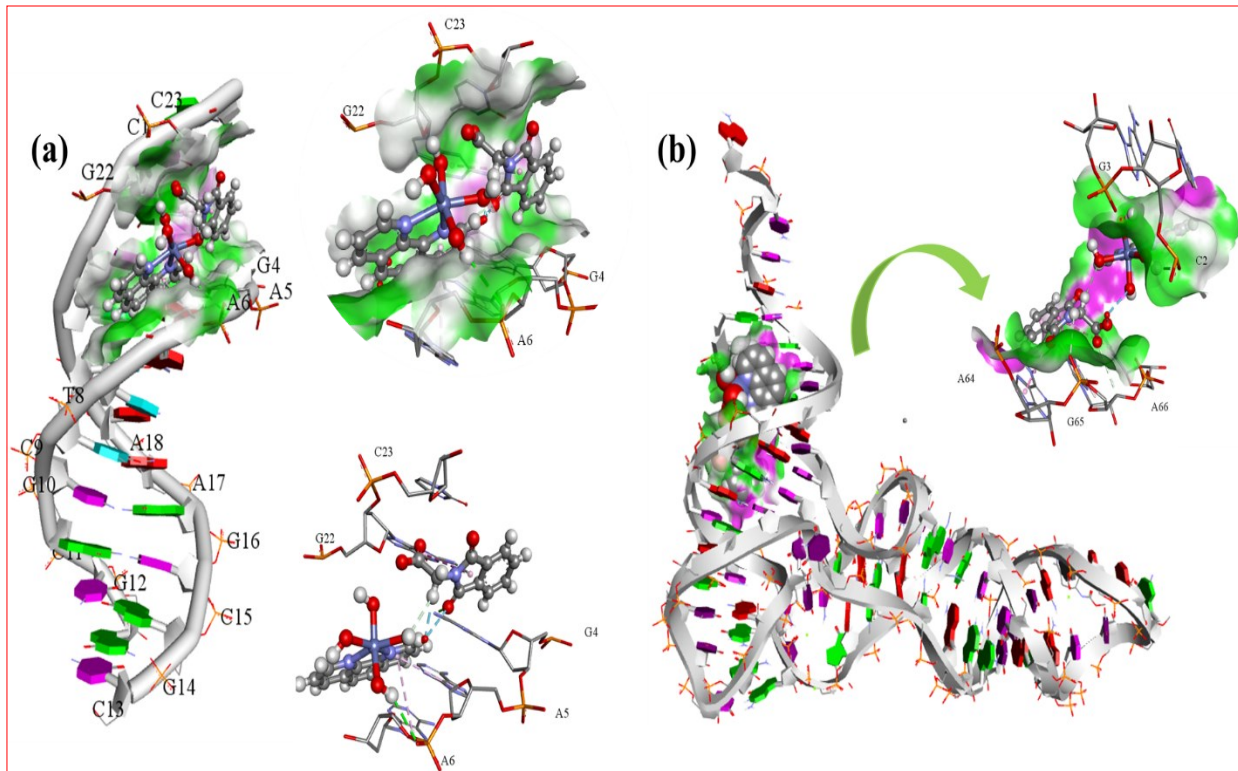

**Fig. S15.** Molecular docked model of complex 4 with (a) DNA and (b) RNA.
